# Supplementary material
Source: HighWire-hosted journal article supplement (https://www.cmaj.ca/highwire/filestream/58149/field_highwire_adjunct_files/0/cvb-marsh-online_appendix_1.pdf)
Supplement: cvb-marsh-online_appendix_1.pdf [file cvb-marsh-online_appendix_1.pdf]

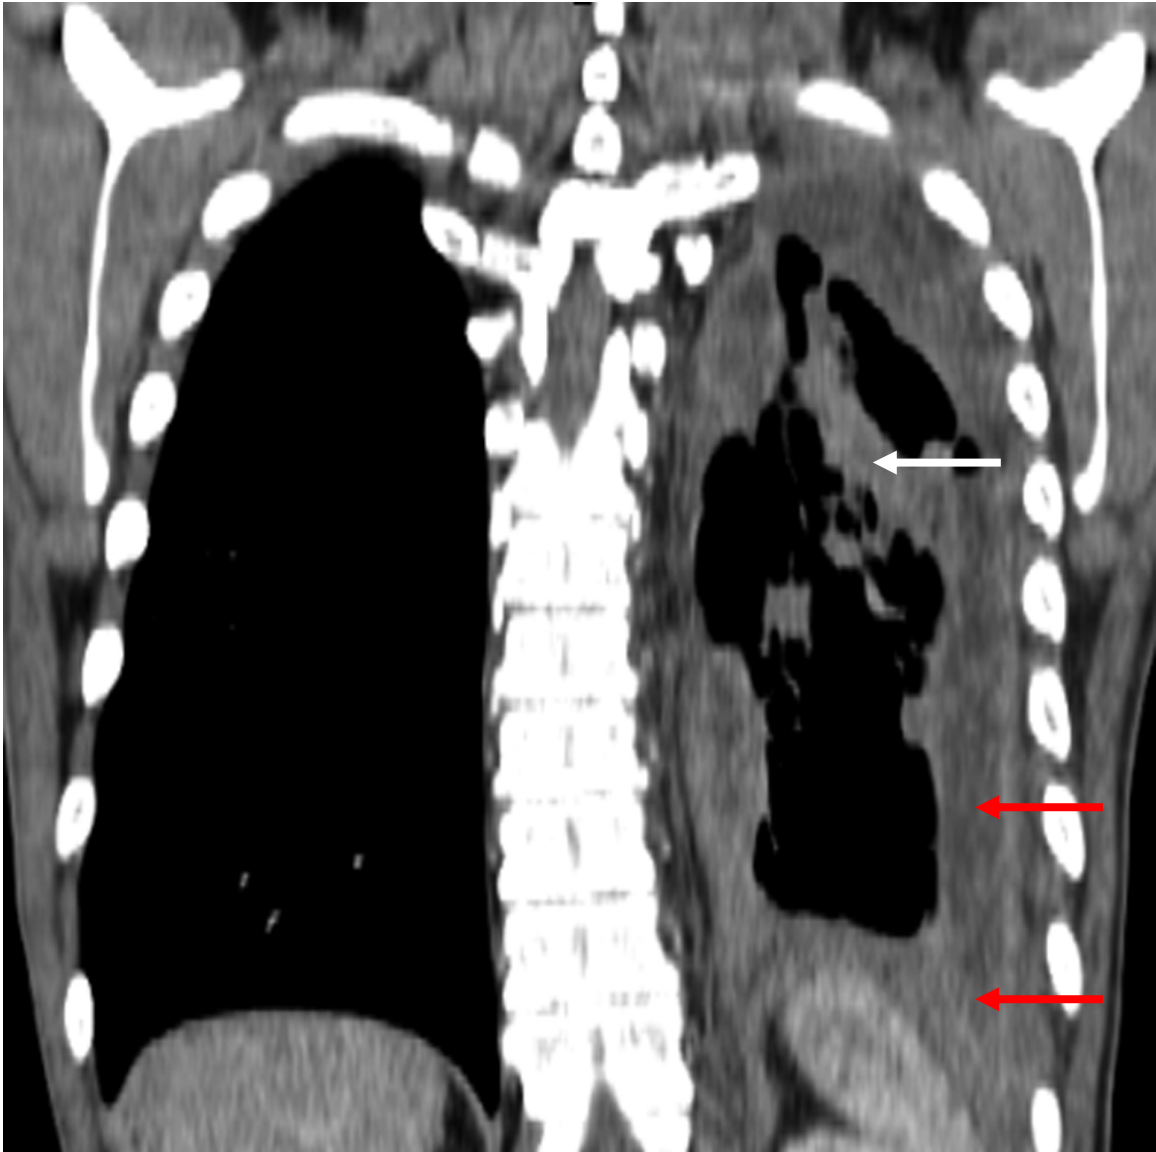

---

**Appendix 1:** A 4-mm coronal CT maximum intensity image. Mediastinal windows confirm the presence of a loculated tuberculous empyema (red arrows). There is associated apical pleural thickening, in addition to thickening and upward retraction of the left major fissure (white arrow) secondary to pleuroparenchymal fibrosis.

---
